# Supplementary material for: High WBP5 expression correlates with elevation of HOX genes levels and is associated with inferior survival in patients with acute myeloid leukaemia
Source: PubMed Central journal article supplement (PMC7044279; doi:10.1038/s41598-020-60480-x), 2020-02-26
Supplement: 41598_2020_60480_MOESM1_ESM.pdf [file 41598_2020_60480_MOESM1_ESM.pdf]

**High *WBP5* expression correlates with elevation of HOX genes levels and is associated with inferior survival in patients with acute myeloid leukaemia**

Ward C, Cauchy P, Garcia P, Frampton J, Esteban MA and Volpe G

**Supplementary information**

**Figure S1. Validation of survival analysis in GSE12417 and GSE37642 datasets**

Kaplan-Meier representation of overall survival (OS) for *WBP5*<sup>low</sup> and *WBP5*<sup>high</sup> AML patients from the GSE12417<sup>21</sup> (left panel) and GSE37642<sup>29</sup> (right panel) prior to or after balancing for age, sex, FAB and cytogenetic findings. The number of patients and the median OS are indicated in the plot. P-value was calculated using log rank Mantel-Cox t-test.

**Figure S2. Hierarchical clustering of GSE1159, GSE22845 and GSE13204 datasets.**

Hierarchical clustering of the Pearson correlation coefficient of mRNA values showing distinct clusters for high and low *WBP5* expressers from the Valk (GSE1159), Haferlach (13204) and Taskesen (GSE22845) cohorts. The mutational status of every patient is indicated by a colour coded graph on the top of the clustering map. A legend indicating each genetic subgroup is placed below the clustering map.

**Figure S3. HOXA and HOXB clusters gene expression in all patient cohorts.**

Expression of all HOXA and HOXB cluster genes, HOX partners (*MEIS1*, *MEIS2*, *MEIS3*, *PBX1*, *PBX2* and *PBX3*) and *WT1*. Data are represented as boxplots in which high expressers are indicated in red and low expressers are indicated in blue. Every plot presents a color-coded boxplot showing a median interquartile range.

**Figure S4. Correlation of FLT3-ITD signature genes expression with high *WBP5* levels in AML patients.**

Boxplots indicating the expression of representative FLT3-ITD molecular signature genes (*CRNDE*, *CLU*, *CTSG*, *IGFBP2*, *CPA3*, *PRDM16*) comparing *WBP5*<sup>low</sup> and *WBP5*<sup>high</sup> AML patients from the Verhaak (GSE6891), Kohlmann (GSE15434), Valk (GSE1159), Haferlach (GSE13204) and Taskesen (GSE22845) cohorts. Every plot presents a color-coded boxplot showing a median interquartile range.

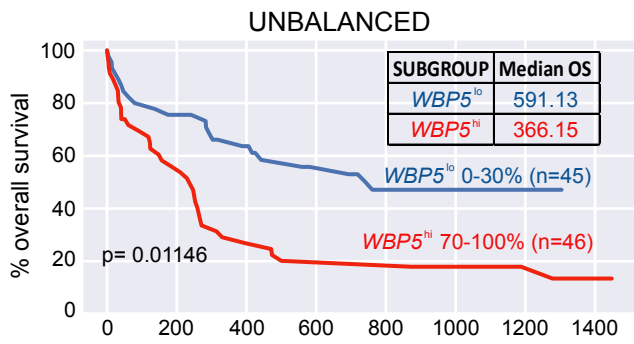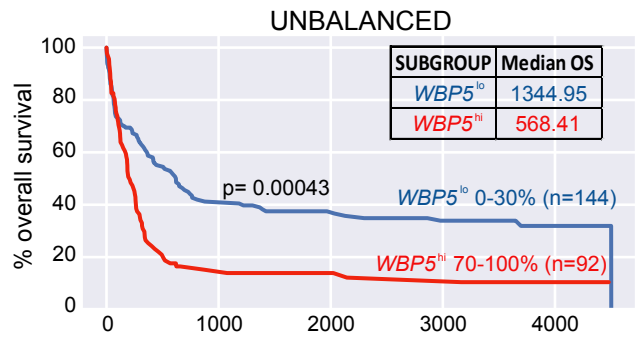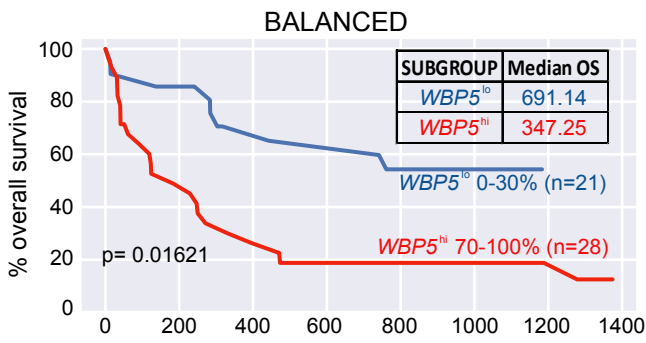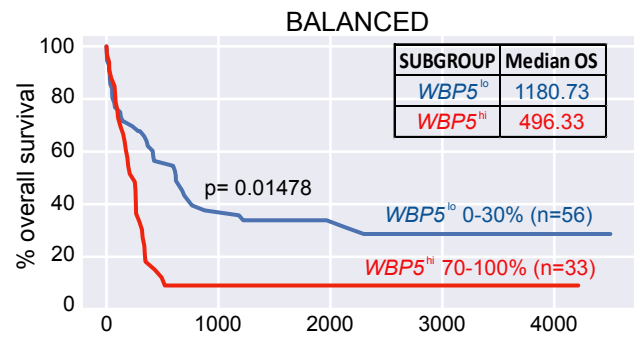

GSE12417  
(Metzeler et al)

GSE37642  
(Li et al)

**Valk Dataset**

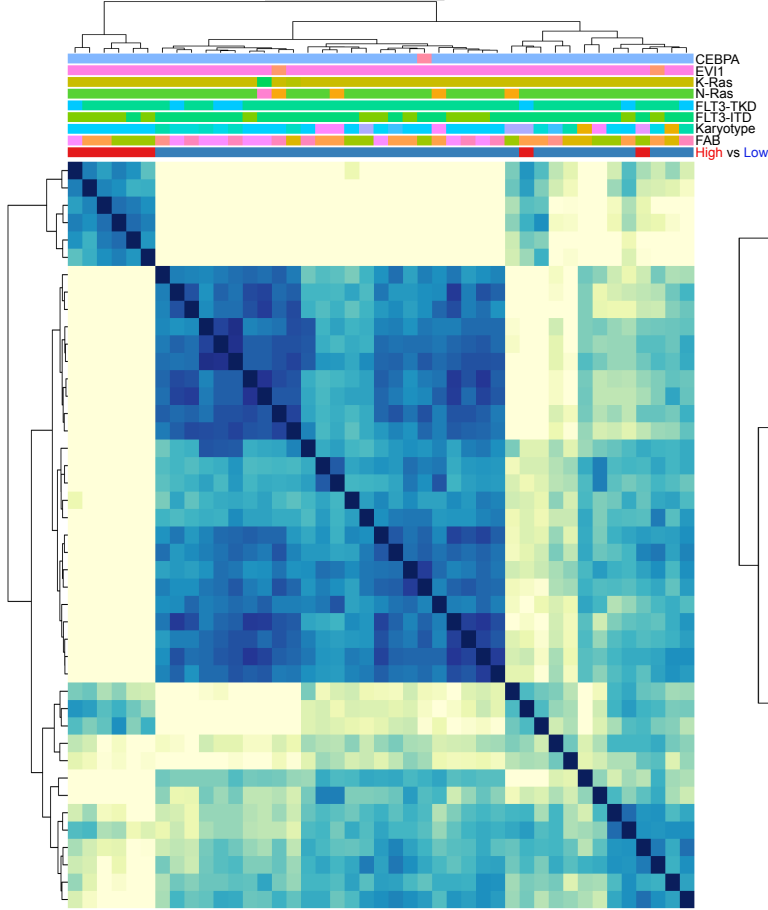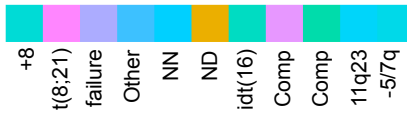

**Taskesen Dataset**

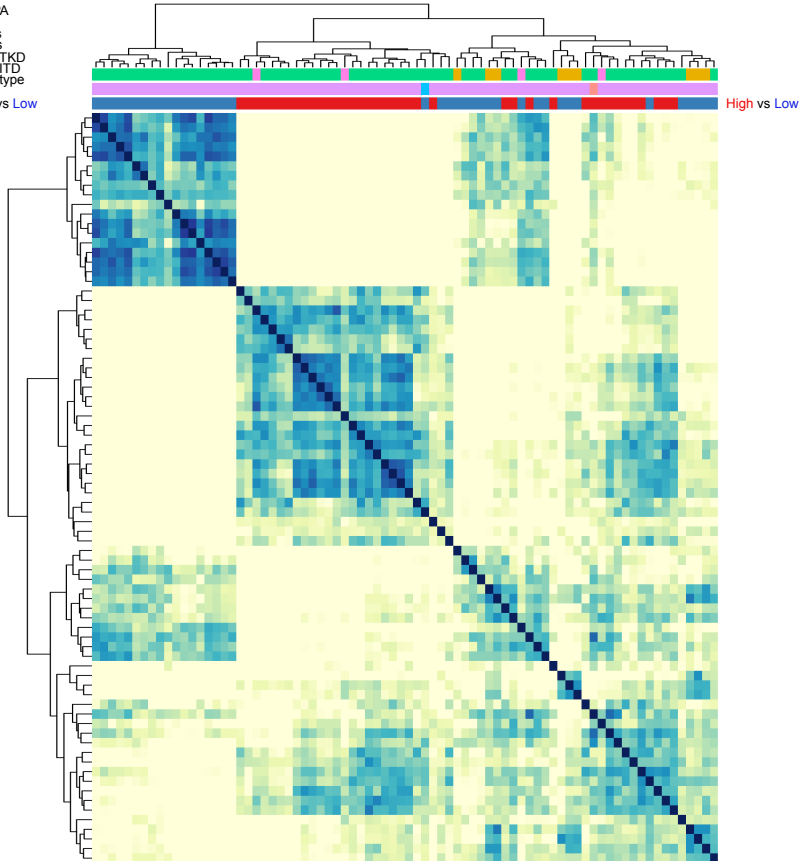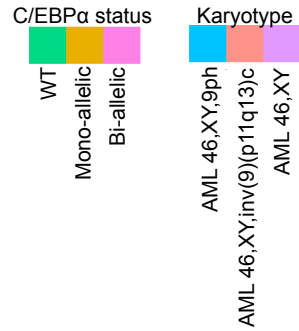

**Haferlach Dataset**

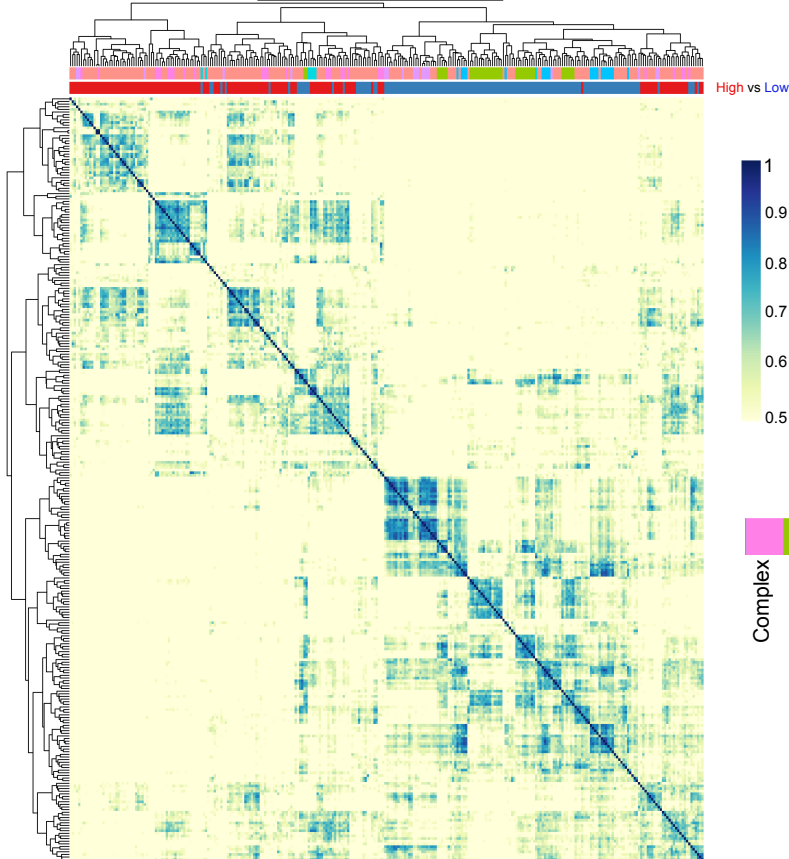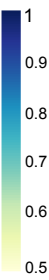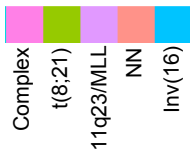



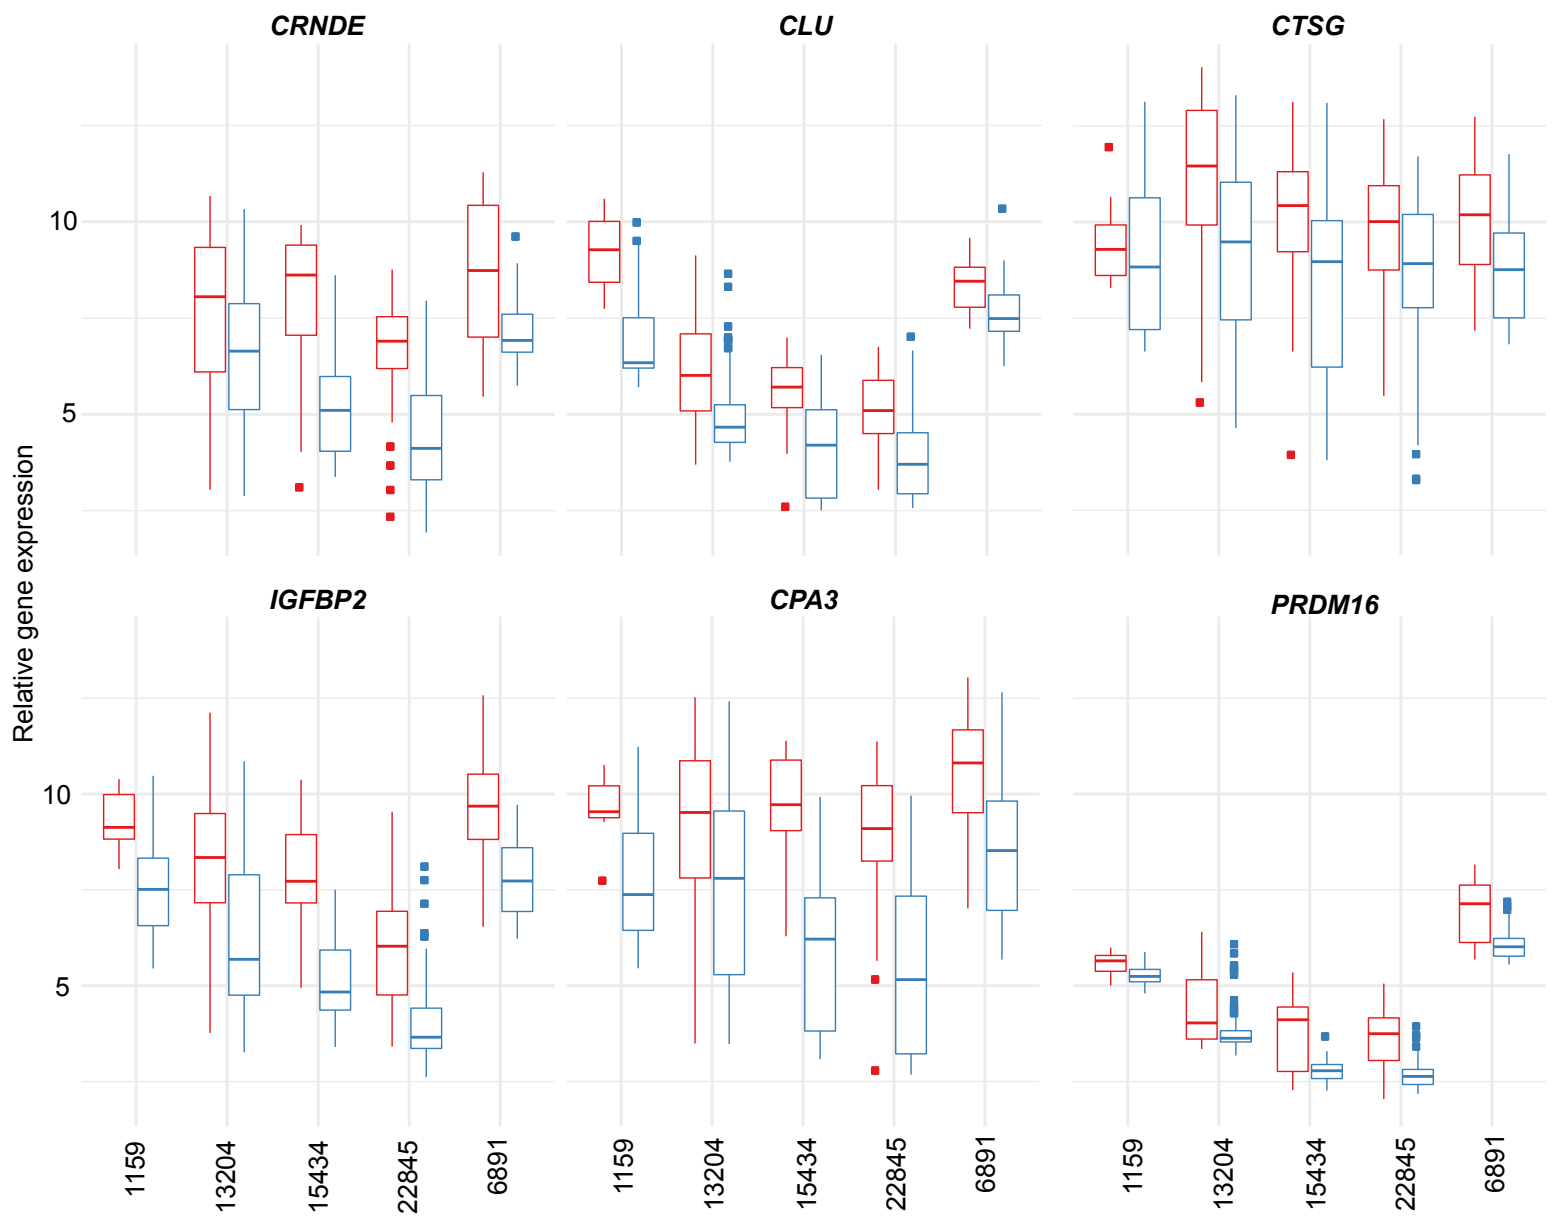

1159 - Valk *et al*

13204 - Haferlach *et al*

15434 - Kohlmann *et al*

22845 - Taskesen *et al*

6891 - Verhaak *et al*

 **WBP5<sup>high</sup>**

 **WBP5<sup>low</sup>**
